# Supplementary material for: Identifying immunologically-vulnerable regions of the HCV E2 glycoprotein and broadly neutralizing antibodies that target them
Source: PubMed Central journal article supplement (PMC6502829; doi:10.1038/s41467-019-09819-1), 2019-05-06
Supplement: 41467_2019_9819_MOESM4_ESM.pdf [file 41467_2019_9819_MOESM4_ESM.pdf]

## **Description of Additional Supplementary Files**

File Name: Supplementary Data 1

Description: The mean escape time predicted for each residue in E2.

File Name: Supplementary Data 2

Description: Accession numbers of E2 sequences used for inferring the model.

File Name: Supplementary Data 3

Description: The experimental fitness (infectivity) measurements for E2 compiled from the literature.
